# Supplementary material
Source: ML conference proceedings conference paper supplement (https://openreview.net/forum?id=vgIz0emVTAd)
Supplement: supplementary_material [file attachment]

# DISCO: Adversarial Defense with Local Implicit Functions

Chih-Hui Ho Nuno Vasconcelos  
 Department of Electrical and Computer Engineering  
 University of California, San Diego  
 {chh279, nvasconcelos}@ucsd.edu

## A Compare to SOTA in RobustBench

In this section, we list the quantitative result of the baselines in RobustBench [14]. Table A, C and D correspond to Fig.6(a), (b) and (c) of the main paper, respectively. Table B shows the baselines under Autoattack with  $\epsilon_2 = 0.5$ . The index displayed in each table corresponds to the index shown in Fig.6 in the main paper. The baselines of each table are grouped into No defense (first block), Adversarially trained defense in RobustBench (second block), Transformation based defense (third block) and DISCO (last block). The results of adversarially trained baselines are copied from RobustBench, while the results of transformation-based defenses are obtained with our implementation. For STL [60], models with different sparse constraints  $\lambda$  are used from the publicly available STL github<sup>1</sup>. DISCO is also combined with various classifiers for evaluation. More discussion can be found in Sec. 4.1 of the paper.

| ID | Method                              | Standard Acc. | Robust Acc.      | Avg. Acc. | Model       | ID | Method                             | Standard Acc. | Robust Acc. | Avg. Acc. | Model       |
|----|-------------------------------------|---------------|------------------|-----------|-------------|----|------------------------------------|---------------|-------------|-----------|-------------|
| 0  | No Defense                          | 94.78         | 0                | 47.39     | WRN28-10    | 1  | Rebuffi et al. [48]                | 92.23         | 66.58       | 79.41     | WRN70-16    |
| 1  | Rebuffi et al. [48]                 | 92.23         | 66.58            | 79.41     | WRN70-16    | 2  | Gowal et al. [25]                  | 88.74         | 66.11       | 77.43     | WRN70-16    |
| 3  | Gowal et al. [24]                   | 91.1          | 65.88            | 78.49     | WRN70-16    | 4  | Rebuffi et al. [48]                | 88.5          | 64.64       | 76.57     | WRN106-16   |
| 5  | Rebuffi et al. [48]                 | 88.54         | 64.25            | 76.4      | WRN70-16    | 6  | Kang et al. [31]                   | 93.73         | 71.28       | 82.51     | WRN70-16    |
| 7  | Gowal et al. [25]                   | 87.5          | 63.44            | 75.47     | WRN28-10    | 8  | Pang et al. [41]                   | 89.01         | 63.35       | 76.18     | WRN70-16    |
| 9  | Rade et al. [47]                    | 91.47         | 62.83            | 77.15     | WRN34-10    | 10 | Schwag et al. [53]                 | 87.3          | 62.79       | 75.05     | ResNest152  |
| 11 | Gowal et al. [24]                   | 89.48         | 62.8             | 76.14     | WRN28-10    | 12 | Huang et al. [27]                  | 91.23         | 62.54       | 76.89     | WRN34-R     |
| 13 | Huang et al. [27]                   | 90.56         | 61.56            | 76.06     | WRN34-R     | 14 | Dai et al. [18]                    | 87.02         | 61.55       | 74.29     | WRN28-10    |
| 15 | Pang et al. [41]                    | 88.61         | 61.04            | 74.83     | WRN28-10    | 16 | Rade et al. [47]                   | 88.16         | 60.97       | 74.57     | WRN28-10    |
| 17 | Rebuffi et al. [48]                 | 87.33         | 60.75            | 74.04     | WRN28-10    | 18 | Wu et al. [66]                     | 87.67         | 60.65       | 74.16     | WRN34-15    |
| 19 | Sridhar et al. [59]                 | 86.53         | 60.41            | 73.47     | WRN34-15    | 20 | Schwag et al. [54]                 | 86.68         | 60.27       | 73.48     | WRN34-10    |
| 21 | Wu et al. [67]                      | 88.25         | 60.04            | 74.15     | WRN28-10    | 22 | Schwag et al. [54]                 | 89.46         | 59.66       | 74.56     | WRN28-10    |
| 23 | Zhang et al. [77]                   | 89.36         | 59.64            | 74.5      | WRN28-10    | 24 | Yair et al. [8]                    | 89.69         | 59.53       | 74.61     | WRN28-10    |
| 25 | Gowal et al. [25]                   | 87.35         | 58.63            | 72.99     | PreActRes18 | 26 | Addepalli et al. [1]               | 85.32         | 58.04       | 71.68     | WRN34-10    |
| 27 | Chen et al. [10]                    | 86.03         | 57.71            | 71.87     | WRN34-20    | 28 | Rade et al. [47]                   | 89.02         | 57.67       | 73.35     | PreActRes18 |
| 29 | Gowal et al. [24]                   | 85.29         | 57.2             | 71.25     | WRN70-16    | 30 | Schwag et al. [55]                 | 88.98         | 57.14       | 73.06     | WRN28-10    |
| 31 | Rade et al. [47]                    | 86.86         | 57.09            | 71.98     | PreActRes18 | 32 | Chen et al. [10]                   | 85.21         | 56.94       | 71.08     | WRN34-10    |
| 33 | Gowal et al. [24]                   | 85.64         | 56.86            | 71.25     | WRN34-20    | 34 | Rebuffi et al. [48]                | 83.53         | 56.66       | 70.1      | PreActRes18 |
| 35 | Wang et al. [63]                    | 87.5          | 56.29            | 71.9      | WRN28-10    | 36 | Wu et al. [67]                     | 85.36         | 56.17       | 70.77     | WRN34-10    |
| 37 | Alayrac et al. [3]                  | 86.46         | 56.03            | 71.25     | WRN28-10    | 38 | Schwag et al. [54]                 | 84.59         | 55.54       | 70.07     | Res18       |
| 39 | Dan et al. [26]                     | 87.11         | 54.92            | 71.02     | WRN28-10    | 40 | Pang et al. [43]                   | 86.43         | 54.39       | 70.41     | WRN34-20    |
| 41 | Pang et al. [44]                    | 85.14         | 53.74            | 69.44     | WRN34-20    | 42 | Cui et al. [17]                    | 88.7          | 53.57       | 71.14     | WRN34-20    |
| 43 | Zhang et al. [76]                   | 84.52         | 53.51            | 69.02     | WRN34-10    | 44 | Rice et al. [49]                   | 85.34         | 53.42       | 69.38     | WRN34-20    |
| 45 | Huang et al. [28]                   | 83.48         | 53.34            | 68.41     | WRN34-10    | 46 | Zhang et al. [74]                  | 84.92         | 53.08       | 69        | WRN34-10    |
| 47 | Cui et al. [16]                     | 88.22         | 52.86            | 70.54     | WRN34-10    | 48 | Qin et al. [46]                    | 86.28         | 52.84       | 69.56     | WRN40-8     |
| 49 | Chen et al. [12]                    | 86.04         | 51.56            | 68.8      | Res50       | 50 | Chen et al. [11]                   | 85.32         | 51.12       | 68.22     | WRN34-10    |
| 51 | Addepalli et al. [2]                | 80.24         | 51.06            | 65.65     | Res18       | 52 | Chawin et al. [58]                 | 86.84         | 50.72       | 68.78     | WRN34-10    |
| 53 | Engstrom et al. [22]                | 87.03         | 49.25            | 68.14     | Res50       | 54 | Sinha et al. [57]                  | 87.8          | 49.12       | 68.46     | WRN34-10    |
| 55 | Mao et al. [38]                     | 86.21         | 47.41            | 66.81     | WRN34-10    | 56 | Zhang et al. [71]                  | 87.2          | 44.83       | 66.02     | WRN34-10    |
| 57 | Madry et al. [36]                   | 87.14         | 44.04            | 65.59     | WRN34-10    | 58 | Maksym et al. [4]                  | 79.84         | 43.93       | 61.89     | PreActRes18 |
| 59 | Pang et al. [42]                    | 80.89         | 43.48            | 62.19     | Res32       | 60 | Wong et al. [64]                   | 83.34         | 43.21       | 63.28     | PreActRes18 |
| 61 | Shafahi et al. [56]                 | 86.11         | 41.47            | 63.79     | WRN34-10    | 62 | Ding et al. [19]                   | 84.36         | 41.44       | 62.9      | WRN28-4     |
| 63 | Souvik et al. [33]                  | 87.32         | 40.41            | 63.87     | Res18       | 64 | Matan et al. [6]                   | 81.3          | 40.22       | 60.76     | Res18       |
| 65 | Moosavi-Dezfooli et al. [39]        | 83.11         | 38.5             | 60.81     | Res18       | 66 | Zhang et al. [72]                  | 89.98         | 36.64       | 63.31     | WRN28-10    |
| 67 | Zhang et al. [73]                   | 90.25         | 36.45            | 63.35     | WRN28-10    | 68 | Jang et al. [29]                   | 78.91         | 34.95       | 56.93     | Res20       |
| 69 | Kim et al. [32]                     | 91.51         | 34.22            | 62.87     | WRN34-10    | 70 | Zhang et al. [75]                  | 44.73         | 32.64       | 38.69     | 5 layer CNN |
| 71 | Wang et al. [62]                    | 92.8          | 29.35            | 61.08     | WRN28-10    | 72 | Xiao et al. [68]                   | 79.28         | 18.5        | 48.89     | DenseNet121 |
| 73 | Jin et al. [30]                     | 90.84         | 1.35             | 46.1      | Res18       | 74 | Aamir et al. [40]                  | 89.16         | 0.28        | 44.72     | Res110      |
| 75 | Chan et al. [9]                     | 93.79         | 0.26             | 47.03     | WRN34-10    |    |                                    |               |             |           |             |
| 76 | Bit Reduction [70]                  | 92.66         | 1.04             | 46.85     | WRN28-10    | 77 | Jpeg [21]                          | 83.9          | 50.73       | 67.32     | WRN28-10    |
| 78 | Input Rand. [69]                    | 94.3          | 8.59             | 51.45     | WRN28-10    | 79 | LlIF [13]                          | 94.85         | 0.22        | 47.54     | WRN28-10    |
| 80 | AutoEncoder                         | 76.54         | 67.41            | 71.98     | WRN28-10    | 81 | STL [60] (k=64 s=8 $\lambda=0.1$ ) | 90.65         | 57.28       | 73.97     | WRN28-10    |
| 82 | STL [60] (k=64 s=8 $\lambda=0.15$ ) | 86.77         | 66.94            | 76.86     | WRN28-10    | 83 | STL [60] (k=64 s=8 $\lambda=0.2$ ) | 82.22         | 67.92       | 75.07     | WRN28-10    |
| 84 | Median Filter                       | 79.67         | 42.49            | 61.08     | WRN28-10    |    |                                    |               |             |           |             |
| 85 | DISCO                               | 89.26         | 85.56 $\pm$ 0.02 | 87.41     | WRN28-10    |    |                                    |               |             |           |             |

Table A: Cifar10 baselines and DISCO under Autoattack ( $\epsilon_\infty = 8/255$ ). This table corresponds to Fig. 6(a) in the main paper.

| ID | Method                              | Standard Acc. | Robust Acc.      | Avg. Acc. | Model       | ID | Method                             | Standard Acc. | Robust Acc. | Avg. Acc. | Model       |
|----|-------------------------------------|---------------|------------------|-----------|-------------|----|------------------------------------|---------------|-------------|-----------|-------------|
| 0  | No Defense                          | 94.78         | 0                | 47.39     | WRN28-10    |    |                                    |               |             |           |             |
| 1  | Rebuffi et al. [48]                 | 95.74         | 82.32            | 89.03     | WRN70-16    | 2  | Gowal et al. [24]                  | 94.74         | 80.53       | 87.64     | WRN70-16    |
| 3  | Rebuffi et al. [48]                 | 92.41         | 80.42            | 86.42     | WRN70-16    | 4  | Rebuffi et al. [48]                | 91.79         | 78.8        | 85.30     | WRN28-10    |
| 5  | Augustin et al. [7]                 | 93.96         | 78.79            | 86.38     | WRN34-10    | 6  | Schwag et al. [53]                 | 90.93         | 77.24       | 84.09     | WRN34-10    |
| 7  | Augustin et al. [7]                 | 92.23         | 76.25            | 84.24     | WRN34-10    | 8  | Rade et al. [47]                   | 90.57         | 76.15       | 83.36     | PreActRes18 |
| 9  | Rebuffi et al. [48]                 | 90.33         | 75.86            | 83.10     | PreActRes18 | 10 | Gowal et al. [24]                  | 90.9          | 74.5        | 82.70     | WRN70-16    |
| 11 | Schwag et al. [53]                  | 89.76         | 74.41            | 82.09     | Res18       | 12 | Wu et al. [67]                     | 88.51         | 73.66       | 81.09     | WRN34-10    |
| 13 | Augustin et al. [7]                 | 91.08         | 72.91            | 82.00     | Res50       | 14 | Engstrom et al. [22]               | 90.83         | 69.24       | 80.04     | Res50       |
| 15 | Rice et al. [49]                    | 88.67         | 67.68            | 78.18     | PreActRes18 | 16 | Rony et al. [50]                   | 89.05         | 66.44       | 77.75     | WRN28-10    |
| 17 | Ding et al. [19]                    | 88.02         | 66.09            | 77.06     | WRN28-4     |    |                                    |               |             |           |             |
| 18 | Bit Reduction [70]                  | 92.66         | 3.8              | 48.23     | WRN28-10    | 19 | Jpeg [21]                          | 83.9          | 69.85       | 76.88     | WRN28-10    |
| 20 | Input Rand. [69]                    | 94.3          | 25.71            | 60.01     | WRN28-10    | 21 | LIIF [13]                          | 94.85         | 0.22        | 47.54     | WRN28-10    |
| 22 | AutoEncoder                         | 76.54         | 71.71            | 74.13     | WRN28-10    | 23 | STL [60] (k=64 s=8 $\lambda=0.1$ ) | 90.65         | 75.55       | 83.1      | WRN28-10    |
| 24 | STL [60] (k=64 s=8 $\lambda=0.15$ ) | 86.77         | 76.45            | 81.61     | WRN28-10    | 25 | STL [60] (k=64 s=8 $\lambda=0.2$ ) | 82.22         | 74.33       | 78.28     | WRN28-10    |
| 26 | Median Filter                       | 79.67         | 63.94            | 71.81     | WRN28-10    |    |                                    |               |             |           |             |
| 27 | DISCO                               | 89.26         | 88.47 $\pm$ 0.16 | 88.87     | WRN28-10    |    |                                    |               |             |           |             |

Table B: Cifar10 baselines and DISCO under Autoattack ( $\epsilon_2 = 0.5$ ).

| ID | Method                              | Standard Acc. | Robust Acc.      | Avg. Acc. | Model       | ID | Method                             | Standard Acc. | Robust Acc.      | Avg. Acc. | Model       |
|----|-------------------------------------|---------------|------------------|-----------|-------------|----|------------------------------------|---------------|------------------|-----------|-------------|
| 0  | No Defense                          | 80.37         | 0                | 41.78     | WRN28-10    |    |                                    |               |                  |           |             |
| 1  | Gowal et al. [24]                   | 69.15         | 36.88            | 53.02     | WRN70-16    | 2  | Rebuffi et al. [48]                | 63.56         | 34.64            | 49.1      | WRN70-16    |
| 3  | Pang et al. [41]                    | 65.56         | 33.05            | 49.31     | WRN70-16    | 4  | Rebuffi et al. [48]                | 62.41         | 32.06            | 47.24     | WRN28-10    |
| 5  | Schwag et al. [53]                  | 65.93         | 31.15            | 48.54     | WRN34-10    | 6  | Pang et al. [41]                   | 63.66         | 31.08            | 47.37     | WRN28-10    |
| 7  | Chen et al. [10]                    | 64.07         | 30.59            | 47.33     | WRN34-10    | 8  | Addepalli et al. [2]               | 65.73         | 30.35            | 48.04     | WRN34-10    |
| 9  | Cui et al. [17]                     | 62.55         | 30.2             | 46.38     | WRN34-20    | 10 | Gowal et al. [24]                  | 60.86         | 30.03            | 45.45     | WRN70-16    |
| 11 | Cui et al. [17]                     | 60.64         | 29.33            | 44.99     | WRN34-10    | 12 | Rade et al. [47]                   | 61.5          | 28.88            | 45.19     | PreActRes18 |
| 13 | Wu et al. [67]                      | 60.38         | 28.86            | 44.62     | WRN34-10    | 14 | Rebuffi et al. [48]                | 56.87         | 28.5             | 42.69     | PreActRes18 |
| 15 | Dan et al. [26]                     | 59.23         | 28.42            | 43.83     | WRN28-10    | 16 | Cui et al. [17]                    | 70.25         | 27.16            | 48.71     | WRN34-10    |
| 17 | Addepalli et al. [2]                | 62.02         | 27.14            | 44.58     | PreActRes18 | 18 | Chen et al. [11]                   | 62.15         | 26.94            | 44.55     | WRN34-10    |
| 19 | Chawin et al. [58]                  | 62.82         | 24.57            | 43.7      | WRN34-10    | 20 | Rice et al. [49]                   | 53.83         | 18.95            | 36.39     | PreActRes18 |
| 21 | Bit Reduction [70]                  | 76.86         | 3.78             | 40.32     | WRN28-10    | 22 | Jpeg [21]                          | 61.89         | 39.59            | 50.74     | WRN28-10    |
| 23 | Input Rand. [69]                    | 73.57         | 3.31             | 38.44     | WRN28-10    | 24 | LIIF [13]                          | 80.3          | 3.36             | 41.83     | WRN28-10    |
| 25 | AutoEncoder                         | 58.79         | 48.36            | 53.575    | WRN28-10    | 26 | STL [60] (k=64 s=8 $\lambda=0.1$ ) | 74.28         | 30.05            | 52.17     | WRN28-10    |
| 27 | STL [60] (k=64 s=8 $\lambda=0.15$ ) | 70.3          | 41.82            | 56.06     | WRN28-10    | 28 | STL [60] (k=64 s=8 $\lambda=0.2$ ) | 67.41         | 46.07            | 56.74     | WRN28-10    |
| 29 | Median Filter                       | 65.78         | 34.52            | 50.15     | WRN28-10    |    |                                    |               |                  |           |             |
| 30 | DISCO                               | 72.07         | 67.93 $\pm$ 0.17 | 70        | WRN28-10    | 31 | DISCO                              | 71.62         | 69.01 $\pm$ 0.19 | 70.32     | WRN34-10    |

Table C: Cifar100 baselines and DISCO under Autoattack ( $\epsilon_\infty = 8/255$ ). This table corresponds to Fig. 6(b) in the main paper.

| ID | Method                             | Standard Acc. | Robust Acc.      | Avg. Acc. | Model   | ID | Method                             | Standard Acc. | Robust Acc.     | Avg. Acc. | Model   |
|----|------------------------------------|---------------|------------------|-----------|---------|----|------------------------------------|---------------|-----------------|-----------|---------|
| 0  | No Defense                         | 76.52         | 0                | 38.26     | Res50   |    |                                    |               |                 |           |         |
| 1  | Hadi et al. [51]                   | 68.46         | 38.14            | 53.3      | WRN50-2 | 2  | Hadi et al. [51]                   | 64.02         | 34.96           | 49.49     | Res50   |
| 3  | Engstrom et al. [22]               | 62.56         | 29.22            | 45.89     | Res50   | 4  | Wong et al. [64]                   | 55.62         | 26.24           | 40.93     | Res50   |
| 5  | Hadi et al. [51]                   | 52.92         | 25.32            | 39.12     | Res18   |    |                                    |               |                 |           |         |
| 6  | Bit Reduction [70]                 | 67.64         | 4.04             | 35.84     | Res18   | 7  | Bit Reduction [70]                 | 73.82         | 1.86            | 37.84     | Res50   |
| 8  | Bit Reduction [70]                 | 75.06         | 4.96             | 40.01     | WRN50-2 | 9  | Jpeg [21]                          | 67.18         | 13.08           | 40.13     | Res18   |
| 10 | Jpeg [21]                          | 73.64         | 33.42            | 53.53     | Res50   | 11 | Jpeg [21]                          | 75.42         | 24.9            | 50.16     | WRN50-2 |
| 12 | Input Rand. [69]                   | 64            | 17.78            | 40.89     | Res18   | 13 | Input Rand. [69]                   | 74.02         | 18.84           | 46.43     | Res50   |
| 14 | Input Rand. [69]                   | 71.7          | 23.58            | 47.64     | WRN50-2 | 15 | STL [60] (k=64 s=8 $\lambda=0.1$ ) | 67.5          | 18.5            | 43        | Res18   |
| 16 | STL [60] (k=64 s=8 $\lambda=0.2$ ) | 65.64         | 32.9             | 49.27     | Res18   | 17 | STL [60] (k=64 s=8 $\lambda=0.1$ ) | 72.56         | 32.7            | 52.63     | Res50   |
| 18 | STL [60] (k=64 s=8 $\lambda=0.2$ ) | 68.3          | 50.16            | 59.23     | Res50   | 19 | Median Filter                      | 66.1          | 10.34           | 38.22     | Res18   |
| 20 | Median Filter                      | 71.68         | 17.36            | 44.52     | Res50   |    |                                    |               |                 |           |         |
| 21 | DISCO                              | 67.98         | 60.88 $\pm$ 0.17 | 64.43     | Res18   | 22 | DISCO                              | 72.64         | 68.2 $\pm$ 0.29 | 70.42     | Res50   |
| 23 | DISCO                              | 75.1          | 69.5 $\pm$ 0.23  | 72.3      | WRN50-2 |    |                                    |               |                 |           |         |

Table D: ImageNet baselines and DISCO under Autoattack ( $\epsilon_\infty = 4/255$ ). This table corresponds to Fig. 6(c) in the main paper.

## B Defense Transfer

In this section, we discuss the qualitative results of DISCO transferability across attacks. Table E, F and G represents the results for Cifar10, Cifar100 and ImageNet, respectively. The corresponding plots are illustrated in Fig. A, B and C. More discussion can be found in Sec. 4.1 of the paper.

Table E: Defense Transfer across  $L_\infty$  attacks ( $\epsilon_\infty = 8/255$ ) on Cifar10.

| Method Classifier | Rebuffi et al. [48]<br>WRN70-16 | Gowal et al. [24]<br>WRN28-10 | DISCO<br>WRN28-10 |
|-------------------|---------------------------------|-------------------------------|-------------------|
| FGSM [23]         | <b>75.66</b>                    | 70.91                         | 64.08             |
| PGD [37]          | 69.93                           | 66.02                         | <b>82.99</b>      |
| BIM [34]          | 69.84                           | 65.95                         | <b>80.46</b>      |
| RFGSM [61]        | 69.8                            | 65.95                         | <b>81.2</b>       |
| EotPgd [35]       | 70.68                           | 66.58                         | <b>76.84</b>      |
| TPgd [74]         | <b>82.32</b>                    | 80.48                         | 81.61             |
| FFgsm [65]        | <b>78.04</b>                    | 73.37                         | 70.1              |
| MiFgsm [20]       | <b>73.22</b>                    | 68.82                         | 45.49             |
| APgd [15]         | 69.46                           | 65.69                         | <b>85.79</b>      |
| Jitter [52]       | 70.15                           | 64.84                         | <b>80.49</b>      |
| Avg.              | 72.72                           | 68.69                         | <b>75.88</b>      |

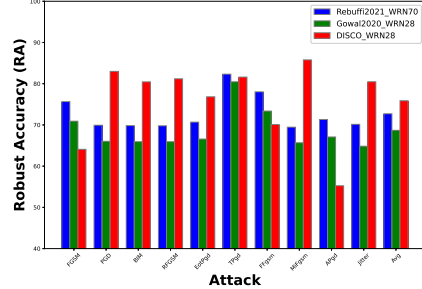

Figure A: Defense Transfer across  $L_\infty$  attacks on Cifar10.

Table F: Defense Transfer across  $L_\infty$  attacks ( $\epsilon_\infty = 8/255$ ) on Cifar100.

| Method Classifier | Gowal et al. [24]<br>WRN70-16 | Rebuffi et al. [48]<br>WRN28-10 | DISCO<br>WRN28-10 |
|-------------------|-------------------------------|---------------------------------|-------------------|
| FGSM [23]         | 44.53                         | 38.57                           | <b>50.4</b>       |
| PGD [37]          | 40.46                         | 36.09                           | <b>74.51</b>      |
| BIM [34]          | 40.38                         | 36.03                           | <b>72.25</b>      |
| RFGSM [61]        | 40.42                         | 35.99                           | <b>72.1</b>       |
| EotPgd [35]       | 41.07                         | 36.45                           | <b>74.8</b>       |
| TPgd [74]         | 57.52                         | 52.01                           | <b>74.06</b>      |
| FFgsm [65]        | 47.61                         | 41.47                           | <b>64.29</b>      |
| MiFgsm [20]       | 42.37                         | 37.31                           | <b>44.14</b>      |
| APgd [15]         | 39.99                         | 35.64                           | <b>77.33</b>      |
| Jitter [52]       | 38.38                         | 33.04                           | <b>73.75</b>      |
| Avg.              | 43.27                         | 38.26                           | <b>67.76</b>      |

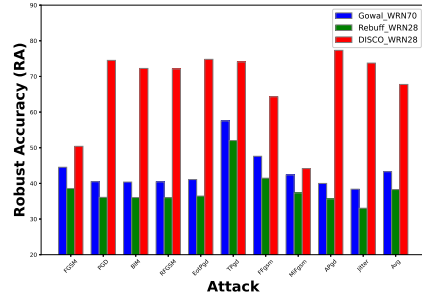

Figure B: Defense Transfer across  $L_\infty$  attacks on Cifar100.

Table G: Defense Transfer across  $L_\infty$  attacks ( $\epsilon_\infty = 4/255$ ) on ImageNet.

| Method Classifier | Hadi et al. [51]<br>Res50 | Engstrom et al. [22]<br>Res50 | DISCO<br>Res50 |
|-------------------|---------------------------|-------------------------------|----------------|
| Clean             | 64.1                      | 62.54                         | <b>72.64</b>   |
| FGSM [23]         | 43.48                     | 39.96                         | <b>55.72</b>   |
| PGD [37]          | 39.28                     | 33.32                         | <b>66.32</b>   |
| BIM [34]          | 39.26                     | 33.2                          | <b>66.4</b>    |
| RFGSM [61]        | 39.28                     | 33.16                         | <b>66.4</b>    |
| EotPgd [35]       | 41.2                      | 37.24                         | <b>69.32</b>   |
| TPgd [74]         | 53.82                     | 49.64                         | <b>69.94</b>   |
| FFgsm [65]        | 43.58                     | 40.1                          | <b>57</b>      |
| MiFgsm [20]       | 40.56                     | 35.6                          | <b>52.38</b>   |
| APgd [15]         | 38.42                     | 32.22                         | <b>68.3</b>    |
| Jitter [52]       | 36.26                     | 31.36                         | <b>67.04</b>   |
| Avg.              | 41.51                     | 36.58                         | <b>63.88</b>   |

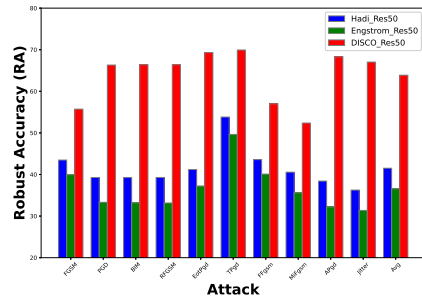

Figure C: Defense Transfer across  $L_\infty$  attacks on ImageNet.

## C Improving Cifar10 and Cifar100 SOTA on RobustBench

Sec. 4.1 in the main paper shows that DISCO can improve the prior SOTA defenses on the ImageNet dataset. In Table H, we further investigate the gain of applying DISCO on SOTA Cifar10 and Cifar100 defenses. The first and second block of Table H show the gains of applying DISCO on [48], which is the prior SOTA defense against  $L_2$  and  $L_\infty$  Autoattack on Cifar10. DISCO also improves the prior

Table H: Improving SOTA defenses on RobustBench [14] for Cifar10 ( $L_2$  and  $L_\infty$ ) and Cifar100 ( $L_\infty$ ) dataset.

| Method              | Dataset  | Norm       | SA           | RA           | Avg.         |
|---------------------|----------|------------|--------------|--------------|--------------|
| Rebuffi et al. [48] | Cifar10  | $L_\infty$ | <b>92.23</b> | 66.58        | 79.41        |
| w/ DISCO            | Cifar10  | $L_\infty$ | 91.95        | <b>70.71</b> | <b>81.33</b> |
| Rebuffi et al. [48] | Cifar10  | $L_2$      | <b>95.74</b> | 82.32        | 89.03        |
| w/ DISCO            | Cifar10  | $L_2$      | 95.24        | <b>84.15</b> | <b>89.7</b>  |
| Gowal et al. [24]   | Cifar100 | $L_\infty$ | <b>69.15</b> | 36.88        | 53.02        |
| w/ DISCO            | Cifar100 | $L_\infty$ | 68.56        | <b>39.77</b> | <b>54.17</b> |

SOTA defense [24] on Cifar100 by 2.89%. These results indicate that, beyond being a robust defense by itself, DISCO can also be applied to existing defenses to improve their robustness.

## D Kernel Size $s$

Table I: Ablation on various kernel size  $s$ .

| $s$ | SA           | RA           | Avg.         |
|-----|--------------|--------------|--------------|
| 1   | 71.22        | <b>69.52</b> | 70.37        |
| 3   | 72.64        | 68.2         | <b>70.42</b> |
| 5   | <b>74.22</b> | 60.1         | 67.16        |

In this section, we ablate the kernel size used to train DISCO on ImageNet. The kernel size  $s$  controls the feature neighborhood forwarded to the local implicit module. Table I shows that  $s = 3$  achieves the best performance, which degrades for  $s = 5$  by a significant margin (3.26%). This shows that while tasks like classification require large and global receptive fields, the projection of adversarial images into the natural image manifold can be done on small neighborhoods. Given that the complexity of modeling the manifold increases with the neighborhood size, it is not surprising that larger  $s$  lead to weaker performance. This is consistent with the well known complexity of synthesizing images with global models, such as GANs. What is somewhat surprising is that even  $s = 1$  is sufficient to enable a robust defense. By default, we use  $s = 3$  in all our experiments.

## E Computation Time for STL and DISCO

Table J: Computation time between of STL [60] and DISCO for different image sizes. Note that STL requires a  $36.34\times$  larger inference time when image size increases from 32 to 224.

| Dataset       | Image Size | STL [60]       | DISCO         |               |               |               |               |
|---------------|------------|----------------|---------------|---------------|---------------|---------------|---------------|
|               |            |                | (K=1)         | (K=2)         | (K=3)         | (K=4)         | (K=5)         |
| Cifar10       | 32         | 0.65           | 0.011         | 0.021         | 0.031         | 0.037         | 0.048         |
| ImageNet      | 224        | 23.71          | 0.027         | 0.081         | 0.134         | 0.191         | 0.251         |
| Time Increase |            | $\times 36.34$ | $\times 2.41$ | $\times 3.86$ | $\times 4.35$ | $\times 5.14$ | $\times 5.19$ |

Table J compares the inference time of STL [60], DISCO and cascade DISCO (from  $K = 2$  to 5) on Cifar10 and ImageNet. For a single image Cifar10 of size  $32\times 32$ , STL requires an Cifar10  $5.9\times$  (0.65 vs 0.011) larger than that of DISCO ( $K=1$ ). When cascade DISCO is used, inference time increases approximately linearly with  $K$ .

For a single ImageNet image of size 224, STL requires 23.71 seconds while DISCO ( $K=1$ ) only requires 0.027. The inference time difference increases to  $878.15\times$  (23.71 vs 0.027) on ImageNet, which is significantly larger than that of Cifar10 ( $5.9\times$ ). This shows that DISCO is a better defense in the sense that it can handle widely varying input image sizes with minor variations of computing cost.

## F Training Details

On Cifar10 and Cifar100, we train the DISCO for 40 epochs. On ImageNet, DISCO is only trained for 3 epochs because ImageNet images are larger and produce more random crops. The learning rate is set to 0.0001 and the Adam optimizer is used in all experiments. All experiments are conducted using Pytorch [45]. All time measurements, for both baselines and DISCO, are made on a single Nvidia Titan Xp GPU with Intel Xeon CPU E5-2630, with batch size 1 and averaged over 100 images.

## G Adopted Code and Benchmark

In this section, we list the url links that are used for training and evaluating DISCO. To create the adversarial-clean training pairs, we adopt the code from TorchAttack<sup>2</sup> and Ares<sup>3</sup>, which support the multiple attack methods. These attack methods are then used to attack pretrained classifiers on Cifar10, Cifar100 and ImageNet. We use the ResNet18 classifiers from Ares<sup>3</sup> for Cifar10, the WideResNet Cifar100 classifiers from this repository<sup>4</sup> and the ResNet18 ImageNet classifiers of Pytorch [45].

To evaluate DISCO, we adopt Autoattack from RobustBench [14]<sup>5</sup> and compare to the pretrained defenses on the RobustBench leaderboard. In addition to Autoattack, we use the AdverTorch<sup>6</sup> library to implement the BPDA attack [5] and the TorchAttack<sup>7</sup> library for other attacks, like FGSM [23] and BIM [34].

For the adversarially trained defense baselines, we adopt the pretrained weights from RobustBench [14]<sup>8</sup>, while the codes for transformation based baselines are adopted from Ares<sup>3</sup>, Cifar autoencoder<sup>9</sup> and STL<sup>1</sup> [60]. To implement DISCO, we use code from LIIF<sup>10</sup> [13].

## H DCT Analysis

The effectiveness of perturbation removal can be analyzed in the frequency domain using the discrete cosine transform (DCT). Consider an image  $x^i$  and the corresponding clean image  $x^i_{cln}$ . The average normalized difference (ND) between DCTs over  $M$  images is defined as

$$ND(\mathcal{X}) = \log \left( \frac{1}{M} \sum_{i=1}^M \left| \frac{DCT(x^i) - DCT(x^i_{cln})}{DCT(x^i_{cln})} \right| \right), \quad (1)$$

where  $\mathcal{X} = \{x^i\}$  can contain adversarial images  $\mathcal{X}_{Adv}$ , the outputs of DISCO  $\mathcal{X}_{Def}$  or the outputs of cascade DISCO  $\mathcal{X}_{CDef}$ . Fig. D(a), (b) and (c) shows the ND obtained for  $\mathcal{X}_{Adv}$ ,  $\mathcal{X}_{Def}$  and  $\mathcal{X}_{CDef}$ , for  $M = 100$  images. Darker areas indicate higher similarity between clean and input images, at a specific frequency. Take Fig. D(a) for example. The dark area concentrates on the low frequency area (upper left corner), while the bright area concentrates on the high frequency area (lower right corner) showing that adversarial noise is mostly of high frequency. Fig. D(b) shows that, after the adversarial image is forwarded through DISCO, the high frequency area becomes darker. Fig. D(d) further highlights the difference between Fig. D(a) and (b), by illustrating  $\mathcal{U}(ND(\mathcal{X}_{Adv}) - ND(\mathcal{X}_{Def}))$ , where  $\mathcal{U}$  is a unit step function. The white area of Fig. D(d) indicates that most of the high frequency perturbations are removed from the adversarial image by DISCO. Similarly, Fig. D(e) demonstrates that cascade DISCO further removes high frequency perturbations when comparing to Fig D(b) and (c).

<sup>2</sup><https://adversarial-attacks-pytorch.readthedocs.io/en/latest/>

<sup>3</sup><https://github.com/thu-ml/ares>

<sup>4</sup><https://github.com/xternalz/WideResNet-pytorch>

<sup>5</sup><https://github.com/RobustBench/robustbench>

<sup>6</sup><https://github.com/BorealisAI/advertorch>

<sup>7</sup><https://adversarial-attacks-pytorch.readthedocs.io/en/latest/>

<sup>8</sup><https://github.com/RobustBench/robustbench>

<sup>9</sup><https://github.com/chenjie/PyTorch-CIFAR-10-autoencoder>

<sup>10</sup><https://github.com/yinboc/liif>

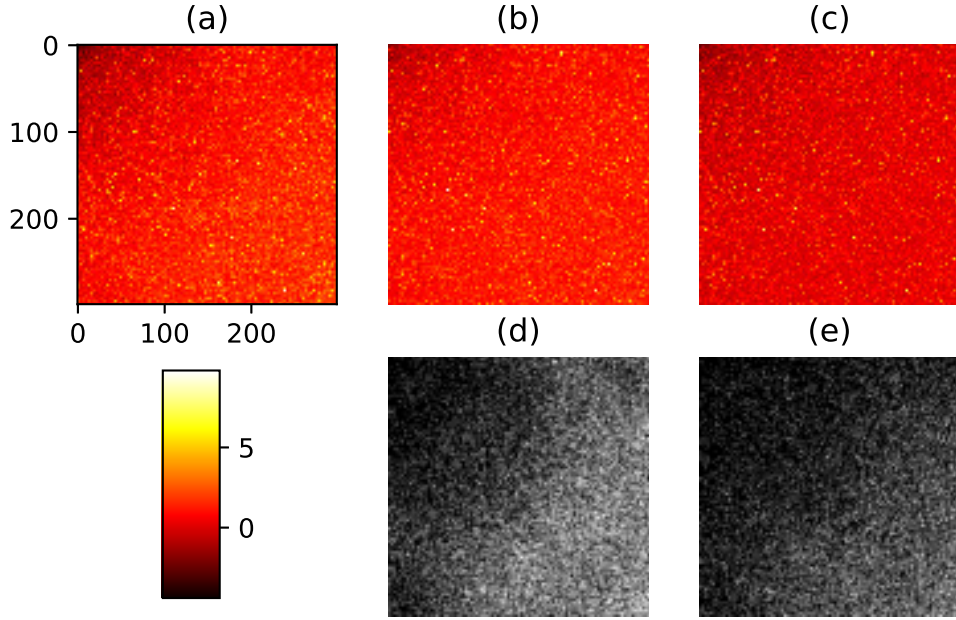

Figure D: (a), (b) and (c) show ND plots for  $\mathcal{X}_{Adv}$ ,  $\mathcal{X}_{Def}$  and  $\mathcal{X}_{CDef}$ , respectively. (d) and (e) show the difference between (a)/(b) and (b)/(c), respectively. See text for more details.

## I Visualizations

DISCO defense outputs against FGSM [23], BIM [34] and PGD [37] attacks are visualized in Fig. E, F and G, respectively. Take Fig. E for example. The first and second rows show the clean and adversarial images, while rows 3-5 show the output of DISCO and cascade DISCO ( $K = 2$  and  $K = 3$ ). Clearly, both DISCO and its cascade version can effectively remove the adversarial perturbation. In addition, Fig. H shows the DISCO output for various images sizes, from 128x128 to 512x512. Note that these images are produced from the same DISCO model without retraining for any output size or attack.



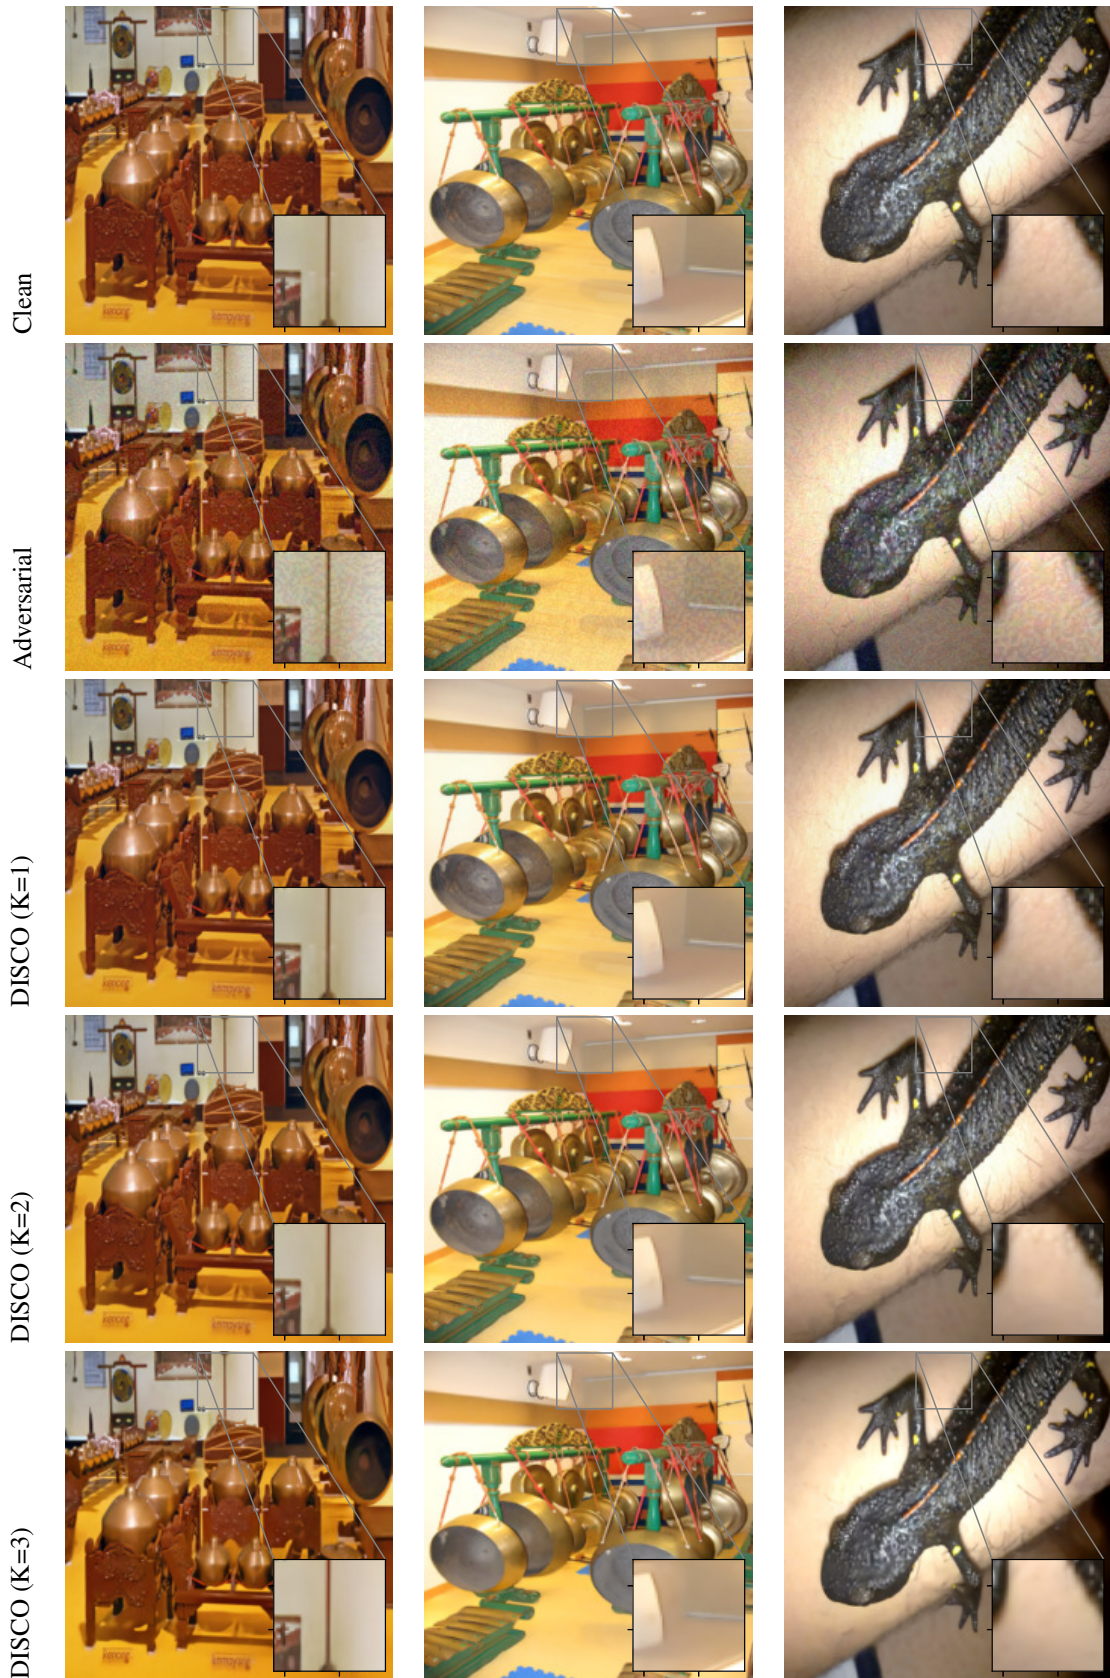

Figure E: Comparison of Clean image, Adversarial image and DISCO output from  $K = 1$  to 3 under FGSM attack.



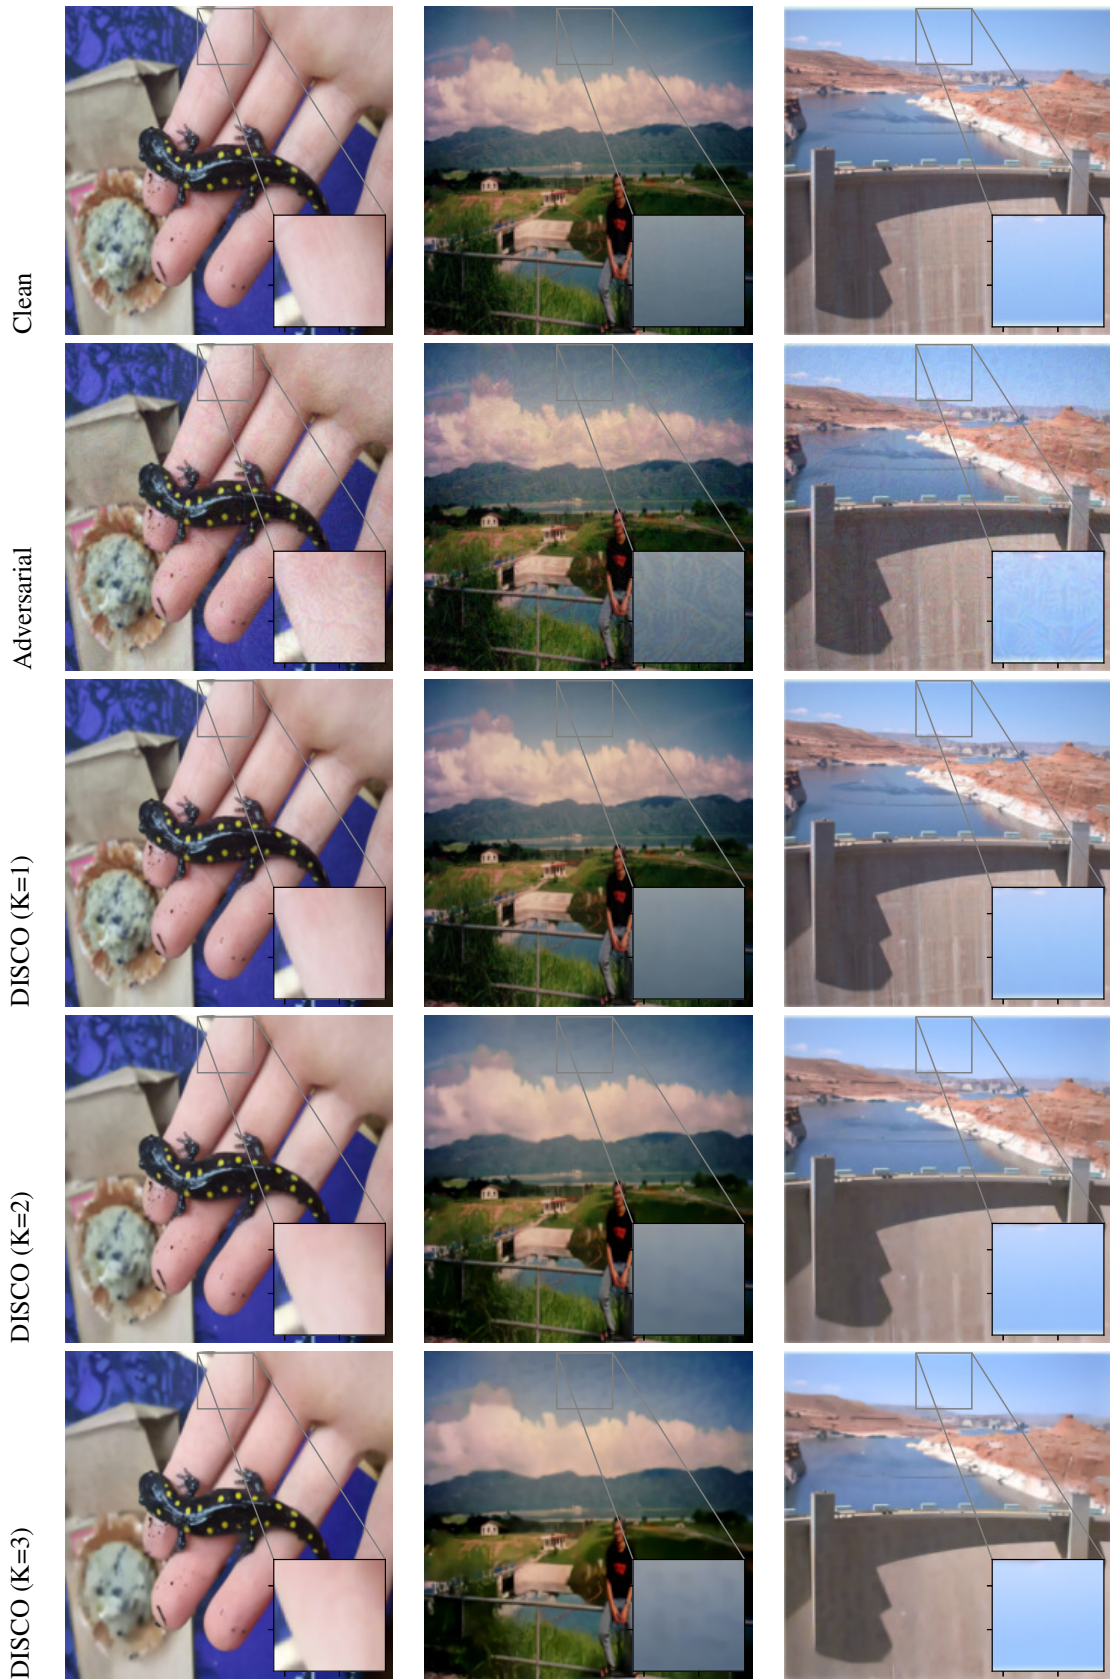

Figure F: Comparison of Clean image, Adversarial image and DISCO output from  $K = 1$  to 3 under BIM attack.



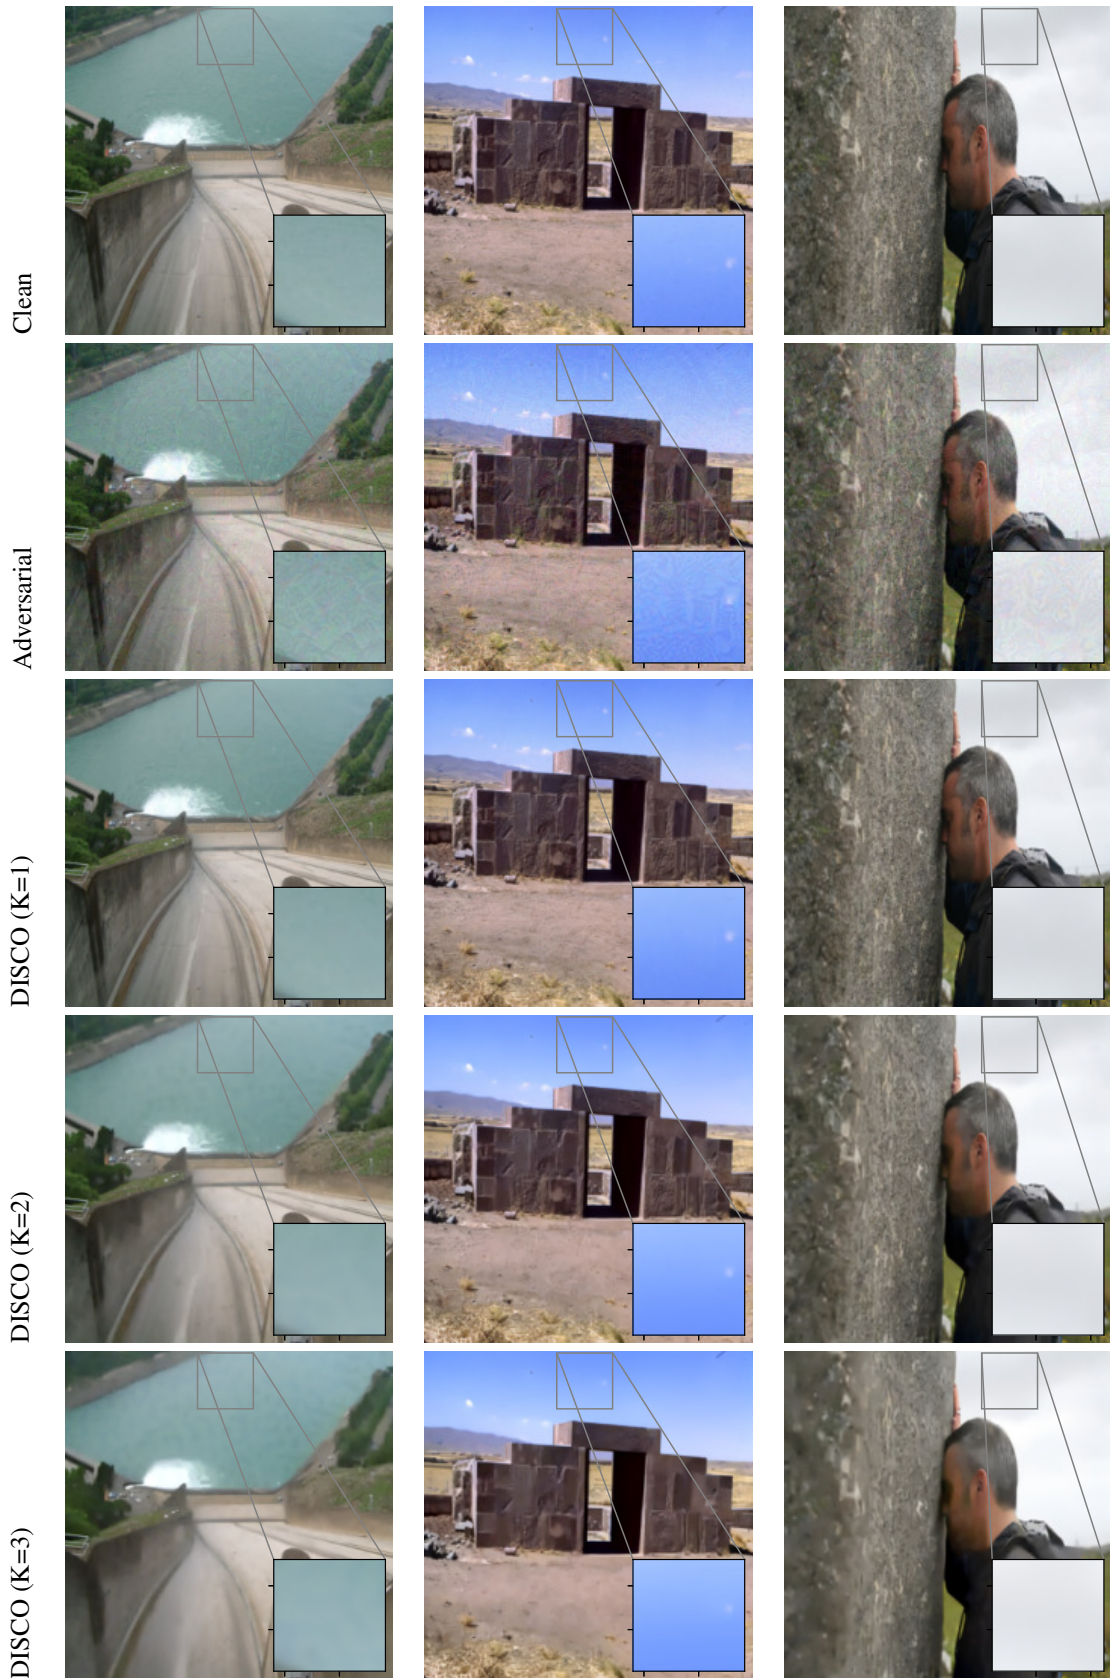

Figure G: Comparison of Clean image, Adversarial image and DISCO output from  $K = 1$  to 3 under PGD attack.

Size: 128

Size: 256

Size: 512

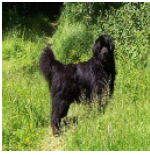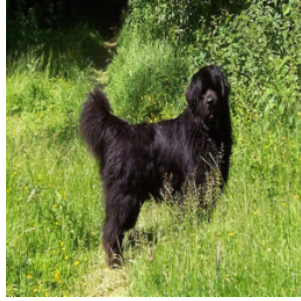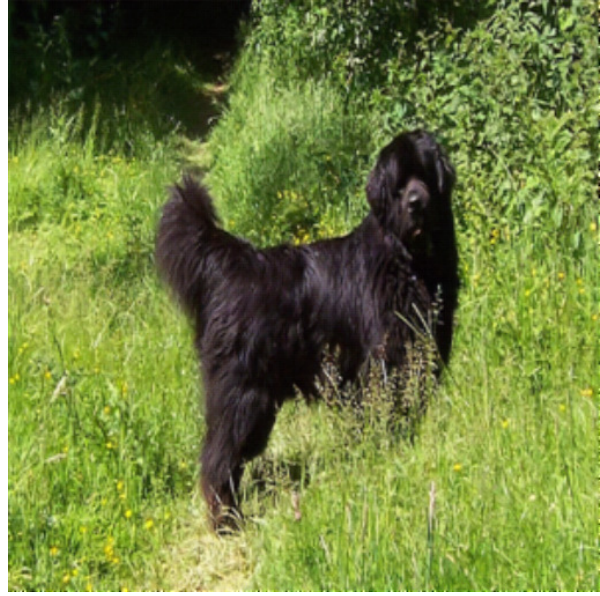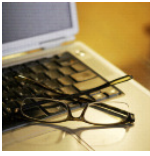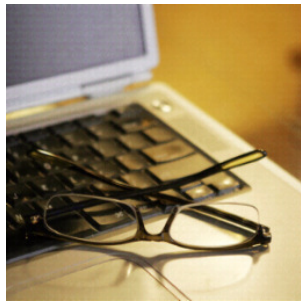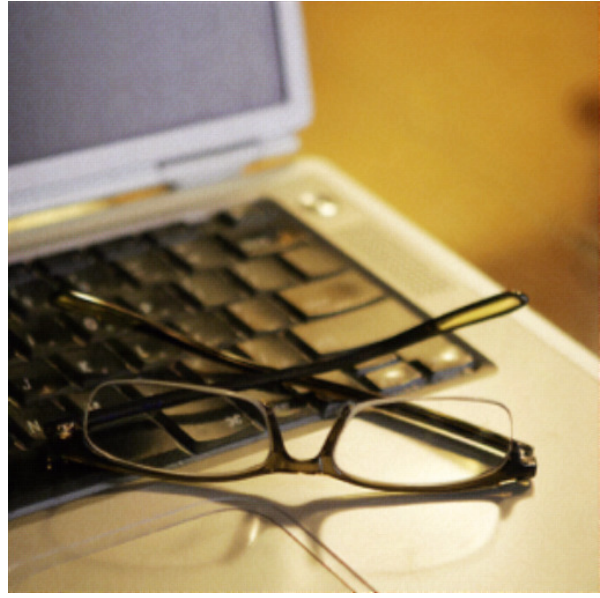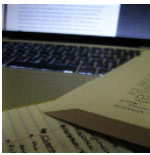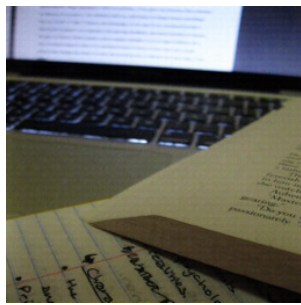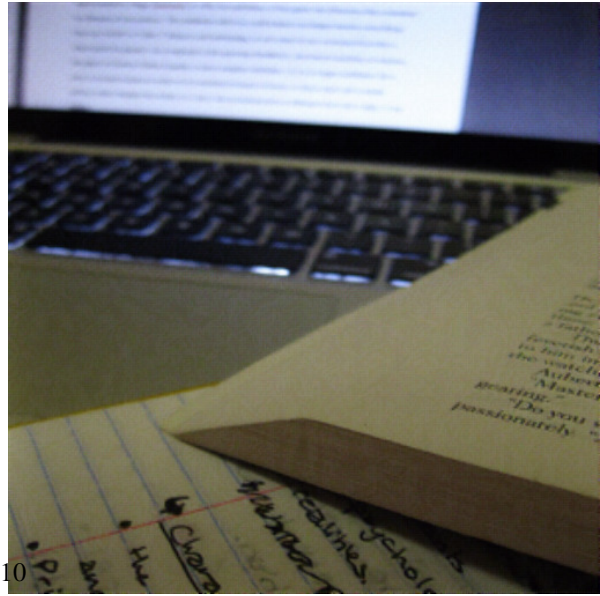

Figure H: Multiple output sizes (128, 256 and 512) of DISCO without re-training.



## References

- [1] Sravanti Addepalli, Samyak Jain, Gaurang Sriramanan, Shivangi Khare, and Venkatesh Babu Radhakrishnan. Towards achieving adversarial robustness beyond perceptual limits. In *ICML 2021 Workshop on Adversarial Machine Learning*, 2021.
- [2] Sravanti Addepalli, Samyak Jain, Gaurang Sriramanan, Shivangi Khare, and Venkatesh Babu Radhakrishnan. Towards achieving adversarial robustness beyond perceptual limits. In *ICML 2021 Workshop on Adversarial Machine Learning*, 2021.
- [3] Jean-Baptiste Alayrac, Jonathan Uesato, Po-Sen Huang, Alhussein Fawzi, Robert Stanforth, and Pushmeet Kohli. Are labels required for improving adversarial robustness? In H. Wallach, H. Larochelle, A. Beygelzimer, F. d'Alché-Buc, E. Fox, and R. Garnett, editors, *Advances in Neural Information Processing Systems*, volume 32. Curran Associates, Inc., 2019.
- [4] Maksym Andriushchenko and Nicolas Flammarion. Understanding and improving fast adversarial training. In *NeurIPS*, 2020.
- [5] Anish Athalye, Nicholas Carlini, and David A. Wagner. Obfuscated gradients give a false sense of security: Circumventing defenses to adversarial examples. In *ICML*, pages 274–283, 2018.
- [6] Matan Atzmon, Niv Haim, Lior Yariv, Ofer Israelov, Haggai Maron, and Yaron Lipman. Controlling neural level sets. In *Advances in Neural Information Processing Systems*, pages 2032–2041, 2019.
- [7] Maximilian Augustin, Alexander Meinke, and Matthias Hein. Adversarial robustness on in- and out-distribution improves explainability. In Andrea Vedaldi, Horst Bischof, Thomas Brox, and Jan-Michael Frahm, editors, *Computer Vision – ECCV 2020*, pages 228–245, Cham, 2020. Springer International Publishing.
- [8] Yair Carmon, Aditi Raghunathan, Ludwig Schmidt, John C Duchi, and Percy S Liang. Unlabeled data improves adversarial robustness. In H. Wallach, H. Larochelle, A. Beygelzimer, F. d'Alché-Buc, E. Fox, and R. Garnett, editors, *Advances in Neural Information Processing Systems*, volume 32. Curran Associates, Inc., 2019.
- [9] Alvin Chan, Yi Tay, Yew Soon Ong, and Jie Fu. Jacobian adversarially regularized networks for robustness. In *International Conference on Learning Representations*, 2020.
- [10] Erh-Chung Chen and Che-Rung Lee. Ltd: Low temperature distillation for robust adversarial training, 2021.
- [11] Jinghui Chen, Yu Cheng, Zhe Gan, Quanquan Gu, and Jingjing Liu. Efficient robust training via backward smoothing, 2021.
- [12] Tianlong Chen, Sijia Liu, Shiyu Chang, Yu Cheng, Lisa Amini, and Zhangyang Wang. Adversarial robustness: From self-supervised pre-training to fine-tuning. In *The IEEE/CVF Conference on Computer Vision and Pattern Recognition (CVPR)*, June 2020.
- [13] Yinbo Chen, Sifei Liu, and Xiaolong Wang. Learning continuous image representation with local implicit image function. In *Proceedings of the IEEE/CVF Conference on Computer Vision and Pattern Recognition*, pages 8628–8638, 2021.
- [14] Francesco Croce, Maksym Andriushchenko, Vikash Sehwal, Edoardo DeBenedetti, Nicolas Flammarion, Mung Chiang, Prateek Mittal, and Matthias Hein. RobustBench: a standardized adversarial robustness benchmark. In *Thirty-fifth Conference on Neural Information Processing Systems Datasets and Benchmarks Track*, 2021.
- [15] Francesco Croce and Matthias Hein. Reliable evaluation of adversarial robustness with an ensemble of diverse parameter-free attacks. In *ICML*, 2020.
- [16] Jiequan Cui, Shu Liu, Liwei Wang, and Jiaya Jia. Learnable boundary guided adversarial training. *arXiv preprint arXiv:2011.11164*, 2020.

- [17] Jiequan Cui, Shu Liu, Liwei Wang, and Jiaya Jia. Learnable boundary guided adversarial training. *2021 IEEE/CVF International Conference on Computer Vision (ICCV)*, pages 15701–15710, 2021.
- [18] Sihui Dai, Saeed Mahloujifar, and Prateek Mittal. Parameterizing activation functions for adversarial robustness. *CoRR*, abs/2110.05626, 2021.
- [19] Gavin Weiguang Ding, Yash Sharma, Kry Yik Chau Lui, and Ruitong Huang. Mma training: Direct input space margin maximization through adversarial training. In *International Conference on Learning Representations*, 2020.
- [20] Yinpeng Dong, Fangzhou Liao, Tianyu Pang, Hang Su, Jun Zhu, Xiaolin Hu, and Jianguo Li. Boosting adversarial attacks with momentum. *2018 IEEE/CVF Conference on Computer Vision and Pattern Recognition*, pages 9185–9193, 2018.
- [21] Gintare Karolina Dziugaite, Zoubin Ghahramani, and Daniel M. Roy. A study of the effect of jpg compression on adversarial images. *ArXiv*, abs/1608.00853, 2016.
- [22] Logan Engstrom, Andrew Ilyas, Hadi Salman, Shibani Santurkar, and Dimitris Tsipras. Robustness (python library), 2019.
- [23] Ian Goodfellow, Jonathon Shlens, and Christian Szegedy. Explaining and harnessing adversarial examples. In *International Conference on Learning Representations*, 2015.
- [24] Sven Gowal, Chongli Qin, Jonathan Uesato, Timothy Mann, and Pushmeet Kohli. Uncovering the limits of adversarial training against norm-bounded adversarial examples. *arXiv preprint arXiv:2010.03593*, 2020.
- [25] Sven Gowal, Sylvestre-Alvise Rebuffi, Olivia Wiles, Florian Stimberg, Dan Andrei Calian, and Timothy A Mann. Improving robustness using generated data. In M. Ranzato, A. Beygelzimer, Y. Dauphin, P.S. Liang, and J. Wortman Vaughan, editors, *Advances in Neural Information Processing Systems*, volume 34, pages 4218–4233. Curran Associates, Inc., 2021.
- [26] Dan Hendrycks, Kimin Lee, and Mantas Mazeika. Using pre-training can improve model robustness and uncertainty. *Proceedings of the International Conference on Machine Learning*, 2019.
- [27] Hanxun Huang, Yisen Wang, Sarah Monazam Erfani, Quanquan Gu, James Bailey, and Xingjun Ma. Exploring architectural ingredients of adversarially robust deep neural networks. In *NeurIPS*, 2021.
- [28] Lang Huang, Chao Zhang, and Hongyang Zhang. Self-adaptive training: beyond empirical risk minimization. In *Advances in Neural Information Processing Systems*, volume 33, 2020.
- [29] Yunseok Jang, Tianchen Zhao, Seunghoon Hong, and Honglak Lee. Adversarial defense via learning to generate diverse attacks. In *2019 IEEE/CVF International Conference on Computer Vision (ICCV)*, pages 2740–2749, 2019.
- [30] Charles Jin and Martin Rinard. Manifold regularization for locally stable deep neural networks, 2021.
- [31] QIYU KANG, Yang Song, Qinxu Ding, and Wee Peng Tay. Stable neural ODE with Lyapunov-stable equilibrium points for defending against adversarial attacks. In A. Beygelzimer, Y. Dauphin, P. Liang, and J. Wortman Vaughan, editors, *Advances in Neural Information Processing Systems*, 2021.
- [32] Jungeum Kim and Xiao Wang. Sensible adversarial learning, 2020.
- [33] Souvik Kundu, Mahdi Nazemi, Peter A. Beerel, and Massoud Pedram. Dnr: A tunable robust pruning framework through dynamic network rewiring of dnns. In *Proceedings of the 26th Asia and South Pacific Design Automation Conference, ASPDAC '21*, page 344–350, New York, NY, USA, 2021. Association for Computing Machinery.
- [34] Alexey Kurakin, Ian Goodfellow, and Samy Bengio. Adversarial examples in the physical world. *ICLR Workshop*, 2017.

- [35] Xuanqing Liu, Yao Li, Chongruo Wu, and Cho-Jui Hsieh. Adv-BNN: Improved adversarial defense through robust bayesian neural network. In *International Conference on Learning Representations*, 2019.
- [36] Aleksander Madry, Aleksandar Makelov, Ludwig Schmidt, Dimitris Tsipras, and Adrian Vladu. Towards deep learning models resistant to adversarial attacks. In *International Conference on Learning Representations*, 2018.
- [37] Aleksander Madry, Aleksandar Makelov, Ludwig Schmidt, Dimitris Tsipras, and Adrian Vladu. Towards deep learning models resistant to adversarial attacks. In *International Conference on Learning Representations*, 2018.
- [38] Chengzhi Mao, Ziyuan Zhong, Junfeng Yang, Carl Vondrick, and Baishakhi Ray. Metric learning for adversarial robustness. In H. Wallach, H. Larochelle, A. Beygelzimer, F. d'Alché-Buc, E. Fox, and R. Garnett, editors, *Advances in Neural Information Processing Systems*, volume 32. Curran Associates, Inc., 2019.
- [39] Seyed-Mohsen Moosavi-Dezfooli, Alhussein Fawzi, Jonathan Uesato, and Pascal Frossard. Robustness via curvature regularization, and vice versa. *2019 IEEE/CVF Conference on Computer Vision and Pattern Recognition (CVPR)*, pages 9070–9078, 2019.
- [40] Aamir Mustafa, Salman Khan, Munawar Hayat, Roland Goecke, Jianbing Shen, and Ling Shao. Adversarial defense by restricting the hidden space of deep neural networks. In *The IEEE International Conference on Computer Vision (ICCV)*, October 2019.
- [41] Tianyu Pang, Min Lin, Xiao Yang, Jun Zhu, and Shuicheng Yan. Robustness and accuracy could be reconcilable by (proper) definition, 2022.
- [42] Tianyu Pang, Kun Xu, Yinpeng Dong, Chao Du, Ning Chen, and Jun Zhu. Rethinking softmax cross-entropy loss for adversarial robustness. In *International Conference on Learning Representations*, 2020.
- [43] Tianyu Pang, Xiao Yang, Yinpeng Dong, Hang Su, and Jun Zhu. Bag of tricks for adversarial training. In *International Conference on Learning Representations*, 2021.
- [44] Tianyu Pang, Xiao Yang, Yinpeng Dong, Kun Xu, Jun Zhu, and Hang Su. Boosting adversarial training with hypersphere embedding. In H. Larochelle, M. Ranzato, R. Hadsell, M.F. Balcan, and H. Lin, editors, *Advances in Neural Information Processing Systems*, volume 33, pages 7779–7792. Curran Associates, Inc., 2020.
- [45] Adam Paszke, Sam Gross, Francisco Massa, Adam Lerer, James Bradbury, Gregory Chanan, Trevor Killeen, Zeming Lin, Natalia Gimelshein, Luca Antiga, Alban Desmaison, Andreas Kopf, Edward Yang, Zachary DeVito, Martin Raison, Alykhan Tejani, Sasank Chilamkurthy, Benoit Steiner, Lu Fang, Junjie Bai, and Soumith Chintala. Pytorch: An imperative style, high-performance deep learning library. In H. Wallach, H. Larochelle, A. Beygelzimer, F. d'Alché-Buc, E. Fox, and R. Garnett, editors, *Advances in Neural Information Processing Systems 32*, pages 8024–8035. Curran Associates, Inc., 2019.
- [46] Chongli Qin, James Martens, Sven Gowal, Dilip Krishnan, Krishnamurthy Dvijotham, Alhussein Fawzi, Soham De, Robert Stanforth, and Pushmeet Kohli. Adversarial robustness through local linearization. In *NeurIPS*, 2019.
- [47] Rahul Rade and Seyed-Mohsen Moosavi-Dezfooli. Helper-based adversarial training: Reducing excessive margin to achieve a better accuracy vs. robustness trade-off. In *ICML 2021 Workshop on Adversarial Machine Learning*, 2021.
- [48] Sylvestre-Alvise Rebuffi, Sven Gowal, Dan Andrei Calian, Florian Stimberg, Olivia Wiles, and Timothy A. Mann. Fixing data augmentation to improve adversarial robustness. *ArXiv*, abs/2103.01946, 2021.
- [49] Leslie Rice, Eric Wong, and J. Zico Kolter. Overfitting in adversarially robust deep learning. In *ICML*, 2020.



- [50] Jérôme Rony, Luiz G. Hafemann, Luiz Oliveira, Ismail Ben Ayed, Robert Sabourin, and Eric Granger. Decoupling direction and norm for efficient gradient-based l2 adversarial attacks and defenses. *2019 IEEE/CVF Conference on Computer Vision and Pattern Recognition (CVPR)*, pages 4317–4325, 2019.
- [51] Hadi Salman, Andrew Ilyas, Logan Engstrom, Ashish Kapoor, and Aleksander Madry. Do adversarially robust imagenet models transfer better? In H. Larochelle, M. Ranzato, R. Hassel, M.F. Balcan, and H. Lin, editors, *Advances in Neural Information Processing Systems*, volume 33, pages 3533–3545. Curran Associates, Inc., 2020.
- [52] Leo Schwinn, René Raab, An Nguyen, Dario Zanca, and Bjoern M. Eskofier. Exploring robust misclassifications of neural networks to enhance adversarial attacks. 2021.
- [53] Vikash Sehwal, Saeed Mahloujifar, Tinashe Handina, Sihui Dai, Chong Xiang, Mung Chiang, and Prateek Mittal. Robust learning meets generative models: Can proxy distributions improve adversarial robustness? In *International Conference on Learning Representations*, 2022.
- [54] Vikash Sehwal, Saeed Mahloujifar, Tinashe Handina, Sihui Dai, Chong Xiang, Mung Chiang, and Prateek Mittal. Robust learning meets generative models: Can proxy distributions improve adversarial robustness? In *International Conference on Learning Representations*, 2022.
- [55] Vikash Sehwal, Shiqi Wang, Prateek Mittal, and Suman Jana. Hydra: Pruning adversarially robust neural networks. *Advances in Neural Information Processing Systems*, 33, 2020.
- [56] Ali Shafahi, Mahyar Najibi, Amin Ghiasi, Zheng Xu, John P. Dickerson, Christoph Studer, Larry S. Davis, Gavin Taylor, and Tom Goldstein. Adversarial training for free! In *NeurIPS*, 2019.
- [57] Abhishek Sinha, Mayank Kumar Singh, Nupur Kumari, Balaji Krishnamurthy, Harshitha Machiraju, and Vineeth N. Balasubramanian. Harnessing the vulnerability of latent layers in adversarially trained models. *ArXiv*, abs/1905.05186, 2019.
- [58] Chawin Sitawarin, Supriyo Chakraborty, and David A. Wagner. Improving adversarial robustness through progressive hardening. *CoRR*, abs/2003.09347, 2020.
- [59] Kaustubh Sridhar, Oleg Sokolsky, Insup Lee, and James Weimer. Robust learning via persistency of excitation. *ArXiv*, abs/2106.02078, 2021.
- [60] Bo Sun, Nian hsuan Tsai, Fangchen Liu, Ronald Yu, and Hao Su. Adversarial defense by stratified convolutional sparse coding. *2019 IEEE/CVF Conference on Computer Vision and Pattern Recognition (CVPR)*, pages 11439–11448, 2019.
- [61] Florian Tramèr, Alexey Kurakin, Nicolas Papernot, Ian Goodfellow, Dan Boneh, and Patrick McDaniel. Ensemble adversarial training: Attacks and defenses. In *International Conference on Learning Representations*, 2018.
- [62] Jianyu Wang. Bilateral adversarial training: Towards fast training of more robust models against adversarial attacks. *2019 IEEE/CVF International Conference on Computer Vision (ICCV)*, pages 6628–6637, 2019.
- [63] Yisen Wang, Difan Zou, Jinfeng Yi, James Bailey, Xingjun Ma, and Quanquan Gu. Improving adversarial robustness requires revisiting misclassified examples. In *International Conference on Learning Representations*, 2020.
- [64] Eric Wong, Leslie Rice, and J. Zico Kolter. Fast is better than free: Revisiting adversarial training. In *International Conference on Learning Representations*, 2020.
- [65] Eric Wong, Leslie Rice, and J. Zico Kolter. Fast is better than free: Revisiting adversarial training. In *International Conference on Learning Representations*, 2020.
- [66] Boxi Wu, Jinghui Chen, Deng Cai, Xiaofei He, and Quanquan Gu. Do wider neural networks really help adversarial robustness? In A. Beygelzimer, Y. Dauphin, P. Liang, and J. Wortman Vaughan, editors, *Advances in Neural Information Processing Systems*, 2021.

- [67] Dongxian Wu, Shu-Tao Xia, and Yisen Wang. Adversarial weight perturbation helps robust generalization. In *NeurIPS*, 2020.
- [68] Chang Xiao, Peilin Zhong, and Changxi Zheng. Enhancing adversarial defense by k-winners-take-all. In *International Conference on Learning Representations*, 2020.
- [69] Cihang Xie, Jianyu Wang, Zhishuai Zhang, Zhou Ren, and Alan Yuille. Mitigating adversarial effects through randomization. In *International Conference on Learning Representations*, 2018.
- [70] Weilin Xu, David Evans, and Yanjun Qi. Feature squeezing: Detecting adversarial examples in deep neural networks. *ArXiv*, abs/1704.01155, 2018.
- [71] Dinghui Zhang, Tianyuan Zhang, Yiping Lu, Zhanxing Zhu, and Bin Dong. *You Only Propagate Once: Accelerating Adversarial Training via Maximal Principle*. Curran Associates Inc., Red Hook, NY, USA, 2019.
- [72] Haichao Zhang and Jianyu Wang. Defense against adversarial attacks using feature scattering-based adversarial training. In *Advances in Neural Information Processing Systems*, 2019.
- [73] Haichao Zhang and Wei Xu. Adversarial interpolation training: A simple approach for improving model robustness, 2020.
- [74] Hongyang Zhang, Yaodong Yu, Jiantao Jiao, Eric P. Xing, Laurent El Ghaoui, and Michael I. Jordan. Theoretically principled trade-off between robustness and accuracy. In *International Conference on Machine Learning*, 2019.
- [75] Huan Zhang, Hongge Chen, Chaowei Xiao, Sven Gowal, Robert Stanforth, Bo Li, Duane Boning, and Cho-Jui Hsieh. Towards stable and efficient training of verifiably robust neural networks. In *International Conference on Learning Representations*, 2020.
- [76] Jingfeng Zhang, Xilie Xu, Bo Han, Gang Niu, Lizhen Cui, Masashi Sugiyama, and Mohan Kankanhalli. Attacks which do not kill training make adversarial learning stronger. In *ICML*, 2020.
- [77] Jingfeng Zhang, Jianing Zhu, Gang Niu, Bo Han, Masashi Sugiyama, and Mohan Kankanhalli. Geometry-aware instance-reweighted adversarial training. In *International Conference on Learning Representations*, 2021.
